# Supplementary material for: Does Delaying Time in Cancer Treatment Affect Mortality? A Retrospective Cohort Study of Korean Lung and Gastric Cancer Patients
Source: MDPI journal article supplement (doi:10.3390/ijerph18073462), 2021-03-26
Supplement: s1 [file s1]

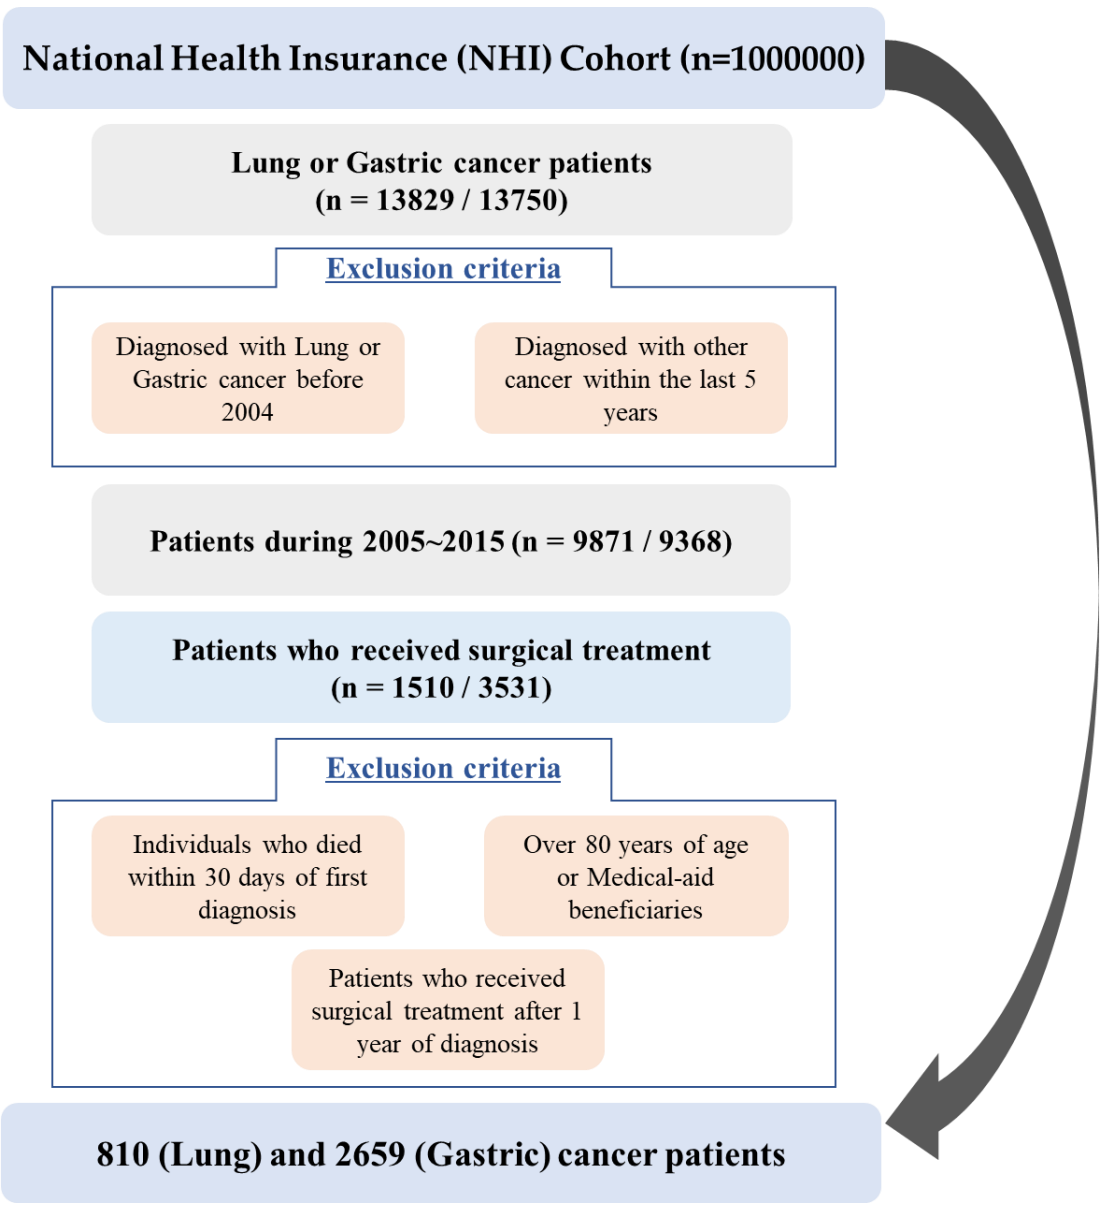

Figure S1. Flow diagram of study participants
